# Supplementary material
Source: publisher figshare collection journal article supplement (https://acs.figshare.com/ndownloader/files/13311026)
Supplement: Supplementary file 1 [file 13311026]

## **Electronic Supporting Information**

### **Study of Short-Chain Alcohol and Alcohol-Water Adsorption in MEL and MFI Zeolites**

**Paula Gómez- Álvarez, Eva G. Noya, Enrique Lomba, Susana Valencia, and João Pires**

Number of pages: 5

Number of Figures: 2

Number of Tables: 1

**Table S1** Non-bonded force field parameters used in the molecular simulations.

|                                | Atom/Site                          | $\epsilon/k_B$ [K] | $\sigma$ [Å] | $q$ [e] |
|--------------------------------|------------------------------------|--------------------|--------------|---------|
| <b>Water</b> <sup>[1]</sup>    | <b>O</b>                           | 93.2               | 3.1589       | -       |
|                                | <b>H</b>                           | -                  | -            | 0.5564  |
|                                | <b>M</b>                           | -                  | -            | -1.1128 |
| <b>Alcohols</b> <sup>[2]</sup> | [CH <sub>3</sub> ]-OH              | 98.0               | 3.750        | 0.265   |
|                                | [CH <sub>3</sub> ]-CH <sub>2</sub> | 98.0               | 3.750        | -       |
|                                | [CH <sub>2</sub> ]-OH              | 46.0               | 3.950        | 0.265   |
|                                | [CH <sub>2</sub> ]-CH <sub>2</sub> | 46.0               | 3.950        | -       |
|                                | <b>O</b>                           | 93.0               | 3.020        | -0.700  |
|                                | <b>H</b>                           | -                  | -            | 0.435   |
| <b>Zeolite</b> <sup>[3]</sup>  | <b>O</b>                           | 53                 | 3.3          | -0.75   |
|                                | <b>Si</b>                          | 22                 | 2.3          | 1.5     |

Lorentz-Berthelot mixing rules<sup>[4]</sup> were used to account for the LJ parameters of the crossed interactions.

**Figure S1.** Simulated single-component adsorption isotherms in pure silica MEL zeolite at 298 K (closed symbols) and 323 K (open symbols) for **a)** alcohols (methanol in red, ethanol in green, 1-butanol in blue) and **b)** water.

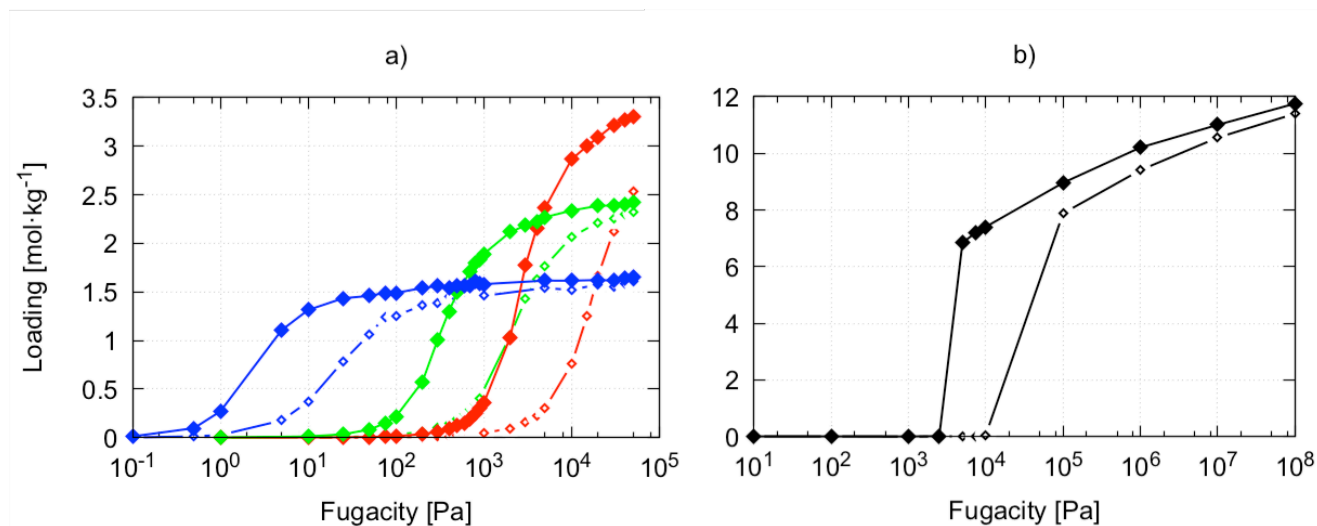

**Figure S2.** Simulated vapor adsorption isotherms at 298 K of 5/95 methanol/water (red), ethanol/water (green) and 1-butanol/water (blue) binary mixtures in pure silica MEL zeolite. Open square and closed circle symbols correspond to alcohol and water adsorption, respectively.

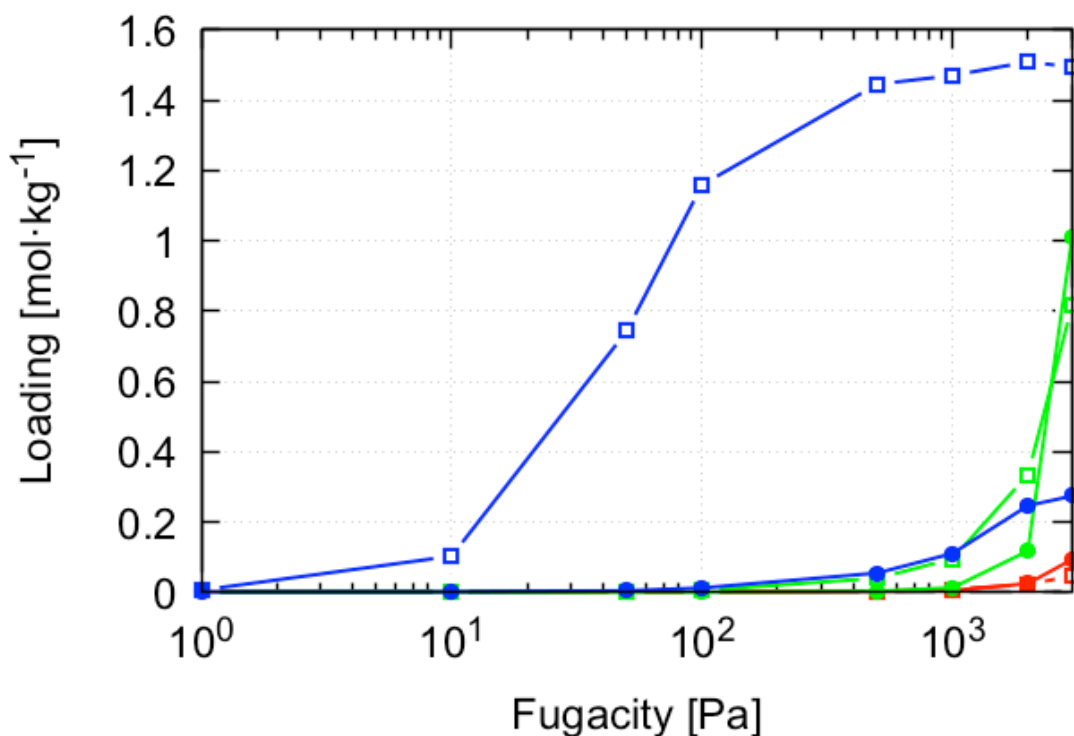

## References

- [1] Abascal, J. L. F.; Vega, C. A General Purpose Model for the Condensed Phases of Water: TIP4P/2005. *J. Chem. Phys.* **2005**, *123*, 1-12.
- [2] Chen, B.; Potoff, J. J.; Siepmann, J. I. Monte Carlo Calculations for Alcohols and their Mixtures with

Alkanes. Transferable Potentials for Phase Equilibria. 5. United-Atom Description of Primary, Secondary, and Tertiary Alcohols. *J. Phys. Chem. B* **2001**, *105*, 3093-3104.

[3] Bai, P.; Tsapatsis, M.; Siepmann, J. I. TraPPE-zeo: Transferable Potentials for Phase Equilibria Force Field for All-Silica Zeolites. *J. Phys. Chem. C* **2013**, *117*, 24375-24387.

[4] Frenkel D.; Smit, B. *Understanding Molecular Simulation*, Academic Press, San Diego, **1996**.
